# Supplementary material for: The RNA-binding profile of the splicing factor SRSF6 in immortalized human pancreatic β-cells
Source: Life Sci Alliance. 2020 Dec 29;4(3):e202000825. doi: 10.26508/lsa.202000825 (PMC7772782; doi:10.26508/lsa.202000825)
Supplement: Supplementary file 6 [file LSA-2020-00825_SdataFS6.xlsx]

## Sheet: Source Data FigS6A
Source Data Supplementary Figure S6A
		siCTL	siSRSF6
		27.5862	43.4783
		30.7692	34.7826
		38.8889	36.0656
		35.0427	38.8889

## Sheet: Source Data FigS6B
Source Data Supplementary Figure S6B

## Sheet: Source Data FigS6C_CDK2
Source Data Supplementary Figure S6C CDK2
		siCTL	siGLIS3
		87.6506	90.2463
		87.1345	85.5856
		94.6154	91.4286
		87.7193	89.6
		93.8776	92.9487

## Sheet: Source Data FigS6C_CENPO
Source Data Supplementary Figure S6C CENPO
		siCT	siGLIS3
		32.9032	29.5482
		31.4286	34.4764
		35.3261	32.7117
		40.6504	37.9418
		27.1725	26.817
		29.8403	28.8922
		32.8647	29.8507
		33.281	29.0491

## Sheet: Source Data FigS6C_RBM6
Source Data Supplementary Figure S6C RBM6
		siCTL	siGLIS3
		60.1351	61.7406
		58.5831	65.7084
		62.0112	68.7845
		69.7802	67.6009
		59.6817	60
		59.5561	57.9903

## Sheet: Source Data FigS6C_STARD10
Source Data Supplementary Figure S6C STARD10
		siCTL	siGLIS3
		75.0238	76.0318
		72.503	74.0545
		81.0244	83.0502
		79.432	81.2216
		74.3204	74.0402
		75.2176	76.6159

## Sheet: Source Data FigS6D
Source Data Supplementary Figure S6D
